# Supplementary material
Source: PubMed Central journal article supplement (PMC3213403)
Supplement: mmc1.pdf [file mmc1.pdf]

The American Journal of Human Genetics, Volume 89

**Supplemental Data**

**Recessive Mutations in *POLR3B*,  
Encoding the Second Largest Subunit of Pol III,  
Cause a Rare Hypomyelinating Leukodystrophy**

Martine Tétreault, Karine Choquet, Simona Orcesi, Davide Tonduti, Umberto Balottin, Martin Teichmann, Sébastien Fribourg, Raphael Schiffmann, Bernard Brais, Adeline Vanderver, and Geneviève Bernard

**Table S1. *POLR3B* primers**

| NAME                      | EXON(S) | PRIMER                      | PRODUCT SIZE (pb) |
|---------------------------|---------|-----------------------------|-------------------|
| <i>POLR3B</i> _EX1-F      | 1       | GTCTTGCAGTTTGCTTGGTG        | 345               |
| <i>POLR3B</i> _EX1-R      |         | TCTGGGATCAGCCTTCACTC        |                   |
| <i>POLR3B</i> _EX2-F      | 2       | AATAACTTATGAAAGTACTGTTGCTGG | 222               |
| <i>POLR3B</i> _EX2-R      |         | TTCCAAACACAGCTATACAAAATC    |                   |
| <i>POLR3B</i> _EX3-4-F    | 3 - 4   | CGAGGATATGCTAGTAAGACGATG    | 602               |
| <i>POLR3B</i> _EX3-4-R    |         | TCTTGACCCCAGGTGATTG         |                   |
| <i>POLR3B</i> _EX5-6-F    | 5 - 6   | TTCCCTCCTTTGTAAAGCTATATG    | 762               |
| <i>POLR3B</i> _EX5-6-R    |         | AACCACGACTATGTGCTGGAC       |                   |
| <i>POLR3B</i> _EX7-F      | 7       | TGCAGCTTTTATCATTGACAGC      | 224               |
| <i>POLR3B</i> _EX7-R      |         | AAATGTTAAAACCACAGCAGC       |                   |
| <i>POLR3B</i> _EX8-F      | 8       | TGCCATTACTAAATCAACACTGG     | 258               |
| <i>POLR3B</i> _EX8-R      |         | GTATTGAAACATAGCCATTTAGGAC   |                   |
| <i>POLR3B</i> _EX9-F      | 9       | CTTATTAGAAAGACCTTGTGATTG    | 336               |
| <i>POLR3B</i> _EX9-R      |         | TCCAAGAATTCCTTACCCTCC       |                   |
| <i>POLR3B</i> _EX10-F     | 10      | AGCATAAGCAAATGTCAGTGAG      | 253               |
| <i>POLR3B</i> _EX10-R     |         | TCAATGAGCAGCATTAAAGTCTC     |                   |
| <i>POLR3B</i> _EX11-F     | 11      | ACATGTGGTTAGGTGCTTGC        | 297               |
| <i>POLR3B</i> _EX11-R     |         | TCTTGAGGAATTGGACTTTAATAAG   |                   |
| <i>POLR3B</i> _EX12-F     | 12      | ACTAGTTGAATTTATTTGAATGGAGAG | 388               |
| <i>POLR3B</i> _EX12-R     |         | TCAAACCTGCAAATATATTTTCATTC  |                   |
| <i>POLR3B</i> _EX13-F     | 13      | TTTTCTGTTTTAAGCAGTTTCTCC    | 375               |
| <i>POLR3B</i> _EX13-R     |         | TCACCTGGATTCTCAAAGTGC       |                   |
| <i>POLR3B</i> _EX14-F     | 14      | ACCGCACGGTATCAGACAAC        | 330               |
| <i>POLR3B</i> _EX14-R     |         | CACCCCATGCACAGACATAG        |                   |
| <i>POLR3B</i> _EX15-F     | 15      | TGCTTTGCATTGCTGCC           | 336               |
| <i>POLR3B</i> _EX15-R     |         | GATAATAATGGATTCCCTCCCC      |                   |
| <i>POLR3B</i> _REDOEX15-F | 15      | TGAAGAGAAATTCCTGAGTT        | 621               |
| <i>POLR3B</i> _REDOEX15-R |         | TATGCCAGCAACTGCAAAAG        |                   |
| <i>POLR3B</i> _EX16-F     | 16      | GGTGGATATTAATCAAGTTGTC      | 344               |
| <i>POLR3B</i> _EX16-R     |         | AAATTTATCTTCACAATGAAAGAGG   |                   |
| <i>POLR3B</i> _EX17-F     | 17      | CTCAGCAATCCAGGAATAGG        | 314               |
| <i>POLR3B</i> _EX17-R     |         | ACAGGCTGGTAATTTGGTGG        |                   |
| <i>POLR3B</i> _EX18-F     | 18      | GCTTTGGGCCTAAACGAAAG        | 300               |
| <i>POLR3B</i> _EX18-R     |         | TCAAAAGAGTAAAAGATAGAAGGACTG |                   |
| <i>POLR3B</i> _EX19-F     | 19      | GACATATAAATCCCTGGAGGACC     | 353               |
| <i>POLR3B</i> _EX19-R     |         | GTTCCAGTGCCTGGTTG           |                   |
| <i>POLR3B</i> _EX20-F     | 20      | GAAATGTTGAACCTGAAGATTTG     | 484               |
| <i>POLR3B</i> _EX20-R     |         | ATCAAAACCCAACCCTCC          |                   |
| <i>POLR3B</i> _EX21-F     | 21      | AGAAGTTTTGGGATTTGGGG        | 400               |
| <i>POLR3B</i> _EX21-R     |         | TTGGATGGTGGTTTTATAGGTTG     |                   |
| <i>POLR3B</i> _EX22-F     | 22      | GTGCATCTTGCCTAGTTCCG        | 284               |
| <i>POLR3B</i> _EX22-R     |         | CACGCCAAGACCTAACTTCG        |                   |
| <i>POLR3B</i> _EX23-F     | 23      | TGGGTGAGAAGTTCACAAAGG       | 412               |
| <i>POLR3B</i> _EX23-R     |         | CAGCATAGAGGAGCAAGTCTACC     |                   |
| <i>POLR3B</i> _EX24-F     | 24      | AAGTACTGTATTCTTCTTTCTGCC    | 228               |
| <i>POLR3B</i> _EX24-R     |         | AAACTAACTGCCTGCTTCTTCC      |                   |
| <i>POLR3B</i> _EX25-F     | 25      | AAGCAGAGAGAGTGCTTGTGC       | 299               |
| <i>POLR3B</i> _EX25-R     |         | CCTTAAGGCTTTGTCTCCCC        |                   |
| <i>POLR3B</i> _EX26-F     | 26      | ATGGGTCCAAAGGCTGTCTC        | 247               |
| <i>POLR3B</i> _EX26-R     |         | GGAAAATACAAGGTGGACTTGAC     |                   |
| <i>POLR3B</i> _EX27-F     | 27      | CTGCCAGCATGTGATGCTAC        | 306               |
| <i>POLR3B</i> _EX27-R     |         | GAGCTGTGATTTAAGAGGCAAG      |                   |
| <i>POLR3B</i> _EX28-F     | 28      | TACGTGGAGGCCTTTGTTC         | 260               |
| <i>POLR3B</i> _EX28-R     |         | TAAATCCCTTCTGCTTCCG         |                   |

Legend: This Table lists all primers used to sequence the 28 exons of *POLR3B*.

Abbreviations used: bp: base pairs, EX: exon, F: forward, R: reverse.
